# Supplementary material for: Metabolic Effects of the Waist-To-Hip Ratio Associated Locus GRB14/COBLL1 Are Related to GRB14 Expression in Adipose Tissue
Source: MDPI journal article supplement (doi:10.3390/ijms23158558), 2022-08-02
Supplement: s1 [file s1]

### A) Epididymal

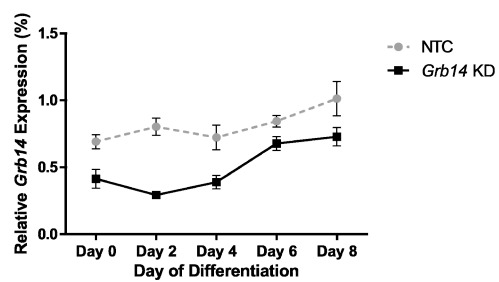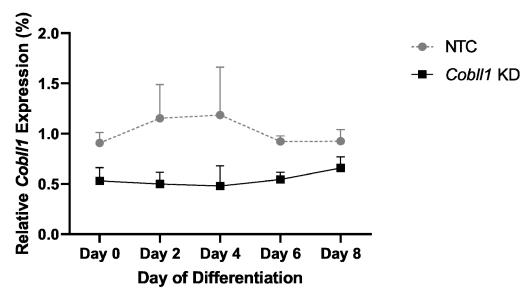

### B) Inguinal

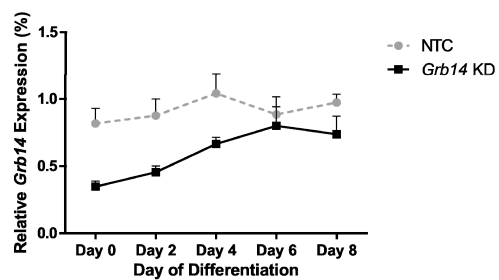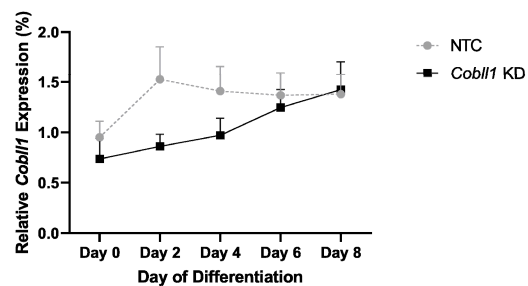

**Figure S1.** Relative mRNA expression of *Grb14* and *Cobll1* in mouse cells. A) in epididymal cells; B) in inguinal cells. Relative mRNA expression normalized to blank comparison group. NTC: non-silencing siRNA group. KD: knock-down.
