# Supplementary material for: Metabolic Effects of the Waist-To-Hip Ratio Associated Locus GRB14/COBLL1 Are Related to GRB14 Expression in Adipose Tissue
Source: Int J Mol Sci. 2022 Aug 2;23(15):8558. doi: 10.3390/ijms23158558 (PMC9369072; doi:10.3390/ijms23158558)
Supplement: Supplementary file 1 [file ijms-23-08558-s001.zip › ijms-1832152-SI.xlsx]

## Sheet: Index
	Table S1	GRB14 and COBLL1 mRNA expression in adipose tissue associate with parameters of obesity and body fat distribution
	Table S2	Case Control Study for T2D in morbid obesity ( >=40 kg/m2) in Leipzig cohort
	Table S3	Rs10195252 and rs6738627 associate with parameters of obesity and body fat distribution
	Table S4	Mediation analysis of SNP for gene expression and metabolic traits
	Table S5	Correlation analysis of GRB14 and COBLL1 mRNA expression in adipose tissue

## Sheet: Table S1
Table 1
		Traits	COBLL1 vis				COBLL1 sc				GRB14 vis				GRB14 sc
			N	p*	beta	95%[CI]	N	p*	beta	95%[CI]	N	p*	beta	95%[CI]	N	p*	beta	95%[CI]
	Anthropometric parameters	BMI (kg/m2)	604	0.458	0.246	[-0.403 0.895]	523	0.3	-0.28	[-0.809 0.25]	559	0.012	0.693	[0.152 1.234]	560	0.425	-0.352	[-1.218 0.514]
		WHR	43	0.633	-0.008	[-0.04 0.025]	43	0.627	-0.004	[-0.023 0.014]	38	0.386	-0.008	[-0.027 0.011]	37	0.257	-0.024	[-0.067 0.018]
		Body fat percentage (%)	145	0.968	0.032	[-1.551 1.61]	101	0.292	-0.52	[-1.496 0.455]	137	0.74	0.161	[-0.797 1.119]	133	1	7.5e-05	[-1.449 1.449]
		visceral fat area (cm2)	18	0.654	10.636	[-39.484 60.755]	18	0.968	0.457	[-24.061 24.975]	14	0.676	-15.895	[-99.187 67.398]	16	0.387	17.164	[-24.779 59.106]
		subcutanrous fat area (cm2)	18	0.159	-61.002	[-149.231 27.226]	18	0.327	-21.035	[-65.636 23.566]	14	0.538	-13.145	[-59.563 33.273]	16	0.824	-8.777	[-93.588 76.033]
		Visceral/subcuta ratio	18	0.381	0.336	[-0.465 1.137]	18	0.201	0.234	[-0.141 0.609]	14	0.858	-0.129	[-1.717 1.458]	16	0.546	0.194	[-0.491 0.878]
	Diabetes parameters	HbA1c (%)	284	0.534	-0.038	[-0.157 0.082]	234	0.058	-0.08	[-0.163 0.003]	268	0.074	0.089	[-0.009 0.186]	254	0.65	0.38	[-0.126 0.202]
		HbA1c (mmol/mol)	330	0.91	-0.068	[-1.256 1.119]	283	0.158	-0.687	[-1.642 0.268]	309	0.003	1.448	[0.481 2.416]	304	0.231	1.05	[-0.672 2.773]
		FPG mmol/l	508	0.876	0.015	[-0.169 0.199]	431	0.607	-0.041	[-0.196 0.114]	473	0.001	0.257	[0.105 0.408]	475	0.493	0.085	[-0.158 0.327]
		FPI (pmol/l)	130	0.395	6.056	[-7.985 20.097]	87	0.473	-3.997	[-15.035 7.041]	122	0.387	5.021	[-6.426 16.469]	120	0.253	-10.934	[-29.771 7.903]
		HOMA-Index	133	0.612	0.206	[-0.594 1.006]	90	0.404	-0.302	[-1.018 0.414]	125	0.478	0.238	[-0.423 0.899]	123	0.357	-0.509	[-1.597 0.58]
		oGTT 2h (mmol/l)	12	0.276	-0.513	[-1.537 1.683]	12	0.624	0.056	[-0.201 0.313]	8	0.084	-0.657	[-1.478 0.164]	10	0.776	-0.083	[-0.795 0.629]
		GIR (mg/kg/min)	14	0.118	-19.03	[-43.978 5.917]	14	0.61	-3.354	[-17.733 11.024]	12	0.638	-8.596	[-49.897 32.706]	12	0.991	0.161	[-31.496 31.818]
	metabolic parameters	Total Cholesterol (mmol/l)	288	0.542	-0.04	[-0.169 0.089]	216	0.6	-0.026	[-0.125 0.073]	267	0.69	-0.019	[-0.112 0.074]	274	0.187	-0.101	[-0.25 0.049]
		HDL-Cholesterol (mmol/l)	294	0.821	0.008	[-0.061 0.077]	222	0.521	0.019	[-0.038 0.075]	272	0.561	-0.015	[-0.067 0.036]	281	0.238	0.049	[-0.032 0.13]
		LDL-Cholesterol (mmol/l)	270	0.646	-0.027	[-0.141 0.088]	220	0.434	-0.034	[-0.118 0.051]	251	0.297	-0.045	[-0.129 0.04]	257	0.085	-0.114	[-0.244 0.016]
		Triglycerides (mmol/l)	294	0.955	0.007	[-0.249 0.264]	220	0.36	-0.096	[-0.302 0.11]	273	0.458	0.072	[-0.119 0.264]	280	0.613	-0.079	[-0.388 0.229]
		free fatty acids (FFA) (mmol/l)	7	0.316	-0.642	[-2.727 1.443]	7	0.27	-0.158	[-0.61 0.293]	5	NA	NA	NA	6	0.388	-0.301	[-2.966 2.365]
		ALAT (µkat/l)	489	0.707	-0.007	[-0.045 0.031]	407	0.379	0.016	[-0.019 0.05]	450	0.705	0.006	[-0.025 0.038]	445	0.584	-0.015	[-0.069 0.039]
		ASAT (µkat/l)	NA	NA	NA	NA	NA	NA	NA	NA	4	NA	NA	NA	3	NA	NA	NA
		gamma-GT (µkat/l)	4	0.25	0.033	[-0.024 0.09]	4	0.611	0.013	[-0.037 0.063]	496	0.022	0.053	[0.008 0.098]	496	0.819	0.009	[-0.07 0.089]
	Fat cell sizes and adipokines	visceral fat cell size (µm)	NA	NA	NA	NA	NA	NA	NA	NA	0	NA	NA	NA	0	NA	NA	NA
		max. vis. Fat cell size (µm)	NA	NA	NA	NA	NA	NA	NA	NA	1	NA	NA	NA	0	NA	NA	NA
		subcutaneous fat cell size (µm)	NA	NA	NA	NA	NA	NA	NA	NA	0	NA	NA	NA	0	NA	NA	NA
		max. sc. Fat cell size (µm)	NA	NA	NA	NA	NA	NA	NA	NA	1	NA	NA	NA	1	NA	NA	NA
		Leptin (ng/ml)	359	0.847	-0.299	[-3.342 2.743]	283	0.502	-0.807	[-3.172 1.558]	335	0.096	-2.198	[-4.791 0.395]	325	0.78	-0.595	[-4.792 3.602]
		Adiponectin (µg/ml)	7	0.718	-1.53	[-17.369 14.309]	7	0.477	1.103	[-4.369 6.576]	5	NA	NA	NA	7	0.805	1.184	[-16.966 19.334]
	Inflammatory parameters and hormone status	C-reactive protein (mg/l)	587	0.122	1.038	[-0.28 2.356]	505	0.612	0.253	[-0.726 1.232]	546	0.353	0.535	[-0.595 1.666]	547	0.54	-0.565	[-2.373 1.243]
		IL-6 (pg/ml)	NA	NA	NA	NA	NA	NA	NA	NA	0	NA	NA	NA	0	NA	NA	NA
		TSH (mU/l)	NA	NA	NA	NA	NA	NA	NA	NA	0	NA	NA	NA	2	NA	NA	NA
		free T3 (pmol/l)	106	0.732	0.027	[-0.127 0.18]	51	0.692	-0.029	[-0.174 0.116]	96	0.296	0.055	[-0.049 0.158]	99	0.175	-0.094	[-0.232 0.043]
		free T4 (pmol/l)	112	0.472	-0.286	[-1.069 0.498]	54	0.569	-0.221	[-0.995 0.553]	102	0.93	0.024	[-0.526 0.575]	105	0.871	-0.06	[-0.789 0.669]
		Vitamin D (ng/ml)	7	0.633	4.355	[-29.228 37.937]	5	NA	NA	NA	7	0.649	-2.383	[-21.746 16.979]	7	0.069	-7.435	[-16.292 1.421]
		Cortisol (nmol/l)	150	0.621	-5.774	[-28.812 17.263]	104	NA	NA	NA	143	0.351	6.982	[-7.773 21.737]	141	0.522	-8.366	[-34.114 17.382]
		Testosterone (nmol/l)	69	0.535	0.167	[-0.368 0.702]	55	0.672	-0.125	[-0.717 0.466]	66	0.564	0.122	[-0.297 0.541]	66	0.61	-0.2	[-0.979 0.58]
	Other	Creatinine (µmol/l)	419	0.091	-2.72	[-5.873 0.433]	354	0.518	-0.849	[-3.429 1.731]	394	0.699	-0.53	[-3.225 2.165]	377	0.732	0.755	[-3.58 5.309]
		Albumin (g/dl)	318	0.398	-0.015	[-0.049 0.02]	243	0.914	0.002	[-0.03 0.033]	297	0.924	0.001	[-0.027 0.03]	302	0.746	0.008	[-0.041 0.057]
		Erythrocyte (Tpt/l)	573	0.242	-0.02	[-0.055 0.014]	491	0.719	0.005	[-0.023 0.033]	532	0.148	-0.022	[-0.051 0.008]	530	0.684	-0.01	[-0.057 0.038]
		Leukocytes (Gpt/l)	590	0.515	-0.062	[-0.248 0.125]	508	0.045	-0.154	[-0.306 -0.003]	549	0.191	0.104	[-0.052 0.261]	549	0.351	-0.12	[-0.374 0.133]
	* Adjusted for sex, age and BMI (except BMI phenotype); Bold p-values indicate statistical significance; beta- effect size; 95%[CI]- 95 % confidence interval; vis- visceral tissue; sc- subcutanous tissue; BMI- body max index; WHR- waist hip ratio; FPG- fasting plasma glucose; FPI- fasting plasma insulin; HbA1c- glycated haemoglobin; HOMA- homeostatic model assessment; oGTT 2h- 120 min plasma gluc…

## Sheet: Table S2
Table 2
	Case Control Study for T2D in morbid obesity ( >=40 kg/m2) in Leipzig cohort
	rs6738627 (G/A)	Control	T2D	Adjusteda p-value (OR[95%CI])	Adjustedb p-value (OR[95%CI])
	AA	74 (17.2%)	42 (10.9%)	0.022 (1.255 [1.034 1.523])	0.011 (1.00)
	AG	197 (46%)	198 (51.3%)		0.004 (1.81 [1.2 2.71])
	GG	157 (36.7%)	146 (37.8%)		0.005 (1.826 [1.2 2.78])
	rs10195252 (T/C)			Adjusteda p-value (OR[95%CI])
	CC	97 (18.3%)	81 (17.3%)	0.458 (1.078[0.884 1.315]	/
	TC	255 (48%)	234 (50%)
	TT	179 (33.7%)	153 (32.7%)
	NGT- subjects with normal glucose tolerance; T2D- subjects with type 2 diabetes; OR- odds ratio for the minor allele. CI- confidence interval. Bold p-values indicate statistical significance; add- additive model; aAdjusted for sex, age, and BMI; bT2D logistic regression for rs6738627, AA as an indicator, adjusted for sex, age and BMI.

## Sheet: Table S3
Table 3
		Traits	rs10195252										rs6738627
				ADD			DOM			REC				ADD			DOM			REC
			N	P	beta	95%[CI]	*P	beta	95%[CI]	*P	beta	95%[CI]	N	*P	beta	95%[CI]	*P	beta	95%[CI]	*P	beta	95%[CI]
	Anthropometric parameters	BMI (kg/m2)	1385	0.313	-0.413	[-1.215 0.39]	0.093	-1.235	[-2.676 0.205]	0.913	-0.067	[-1.268 1.135]	1130	0.278	-0.518	[-1.456 0.419]	0.453	-0.514	[-1.855 0.828]	0.281	-0.99	[-2.791 0.812]
		WHR	394	0.912	-0.001	[-0.016 0.014]	0.265	0.016	[-0.012 0.043]	0.286	-0.012	[-0.034 0.1]	384	0.516	-0.005	[-0.021 0.01]	0.318	-0.011	[-0.033 0.011]	0.895	0.002	[-0.028 0.033]
		Body fat percentage (%)	584	0.903	-0.048	[-0.817 0.721]	0.761	0.217	[-1.181 1.615]	0.665	-0.253	[-1.403 0.897]	574	0.393	-0.346	[-1.14 0.449]	0.411	-0.476	[-1.611 0.659]	0.594	-0.415	[-1.941 1.111]
		visceral fat area (cm2)	196	0.224	14.195	[-8.734 37.124]	0.183	27.176	[-12.888 67.24]	0.498	11.772	[-22.466 46.010]	201	0.606	6.007	[-16.927 28.941]	0.622	7.898	[-23.617 39.412]	0.758	7.082	[-38.129 52.293]
		subcutanrous fat area (cm2)	197	0.916	-3.53	[-69.202 62.142]	0.827	12.74	[-102.018 127.498]	0.79	-17.056	[-114.761 80.648]	202	0.763	9.914	[-54.96 74.788]	0.882	6.726	[-82.335 95.786]	0.704	24.601	[-103.132 152.335]
		Visceral/subcuta ratio	196	0.372	0.048	[-0.057 0.153]	0.06	0.175	[-0.007 0.358]	0.16	-0.021	[-0.178 0.136]	201	0.482	0.038	[-0.068 0.143]	0.651	0.033	[-0.111 0.178]	0.462	0.078	[-0.13 0.285]
	Diabetes parameters	HbA1c (%)	805	0.019	0.147	[0.025 0.27]	0.011	0.289	[0.066 0.511]	0.152	0.131	[-0.052 0.313]	754	0.1	0.108	[-0.021 0.237]	0.2	0.119	[-0.064 0.302]	0.147	0.186	[-0.065 0.438]
		HbA1c (mmol/mol)	636	0.024	1.575	[-0.005 3.155]	0.103	2.377	[-0.484 5.237]	0.113	1.924	[-0.456 4.305]	509	0.078	1.634	[-0.185 3.453]	0.05	2.657	[-0.002 5.316]	0.424	1.407	[-2.049 4.863]
		FPG mmol/l	1225	0.009	0.269	[0.068 0.47]	0.014	0.454	[0.092 0.817]	0.061	0.286	[-0.013 0.586]	1006	0.013	0.256	[0.053 0.459]	0.022	0.34	[0.049 0.63]	0.095	0.333	[-0.058 0.723]
		FPI (pmol/l)	643	0.817	1.738	[-13.021 16.498]	0.837	-2.788	[-29.379 23.803]	0.602	5.93	[-16.367 28.227]	627	0.671	3.257	[-11.812 18.326]	0.827	2.455	[-19.548 24.459]	0.602	7.605	[-21.034 36.245]
		HOMA-Index	597	0.448	0.309	[-0.491 1.109]	0.987	0.012	[-1.428 1.452]	0.257	0.698	[-0.511 1.906]	587	0.347	0.394	[-0.427 1.215]	0.34	0.582	[-0.614 1.779]	0.586	0.434	[-1.13 1.998]
		oGTT 2h (mmol/l)	115	0.452	-0.271	[-0.984 0.441]	0.909	-0.7	[-1.276 1.136]	0.289	-0.592	[-1.694 0.509]	113	0.416	-0.313	[-1.072 0.446]	0.588	-0.291	[-1.352 0.77]	0.413	-0.606	[-2.068 0.855]
		GIR (mg/kg/min)	108	0.776	1.023	[-6.077 8.123]	0.245	-7.038	[-18.984 4.908]	0.128	8.48	[-2.485 19.446]	112	0.009	9.755	[2.457 17.053]	0.008	13.542	[3.687 23.398]	0.21	9.605	[-5.496 24.706]
	metabolic parameters	Total Cholesterol (mmol/l)	813	0.876	-0.008	[-0.111 0.094]	0.876	-0.015	[-0.2 0.17]	0.916	-0.008	[-0.164 0.147]	653	0.413	-0.045	[-0.154 0.063]	0.69	-0.032	[-0.19 0.126]	0.299	-0.109	[-0.316 0.097]
		HDL-Cholesterol (mmol/l)	816	0.601	0.012	[-0.032 0.056]	0.746	-0.013	[-0.093 0.066]	0.289	0.036	[-0.031 0.102]	718	0.317	0.025	[-0.024 0.074]	0.171	0.05	[-0.021 0.121]	0.913	0.005	[-0.089 0.1]
		LDL-Cholesterol (mmol/l)	792	0.791	0.013	[-0.082 0.107]	0.449	0.066	[-0.105 0.237]	0.818	-0.017	[-0.159 0.126]	697	0.499	-0.035	[-0.137 0.067]	0.614	-0.038	[-0.185 0.109]	0.529	-0.063	[-0.259 0.133]
		Triglycerides (mmol/l)	819	0.006	0.198	[0.058 0.339]	0.209	0.162	[-0.091 0.416]	0.002	0.339	[0.127 0.551]	723	0.004	0.146	[0.047 0.245]	0.002	0.233	[0.089 0.378]	0.174	0.132	[-0.058 0.321]
		free fatty acids (FFA) (mmol/l)	214	0.661	-0.014	[-0.078 0.049]	0.949	0.004	[-0.111 0.118]	0.489	-0.033	[-0.126 0.06]	211	0.71	-0.012	[-0.077 0.053]	0.81	-0.011	[-0.098 0.077]	0.692	-0.027	[-0.159 0.106]
		ALAT (µkat/l)	1215	0.174	-0.092	[-0.224 0.041]	0.075	-0.216	[-0.453 0.022]	0.584	-0.056	[-0.255 0.143]	1052	0.157	-0.112	[-0.266 0.043]	0.646	-0.052	[-0.273 0.169]	0.035	-0.32	[-0.617 -0.022]
		ASAT (µkat/l)	963	0.585	-30.244	[-187.921 127.432]	0.585	-60.489	[-375.841 254.864]	0.585	-60.489	[-375.841 254.864]	3	NA	NA	NA	NA	NA	NA	NA	NA	NA
		gamma-GT (µkat/l)	1245	0.294	-0.118	[-0.338 0.102]	0.109	-0.323	[-0.719 0.073]	0.81	-0.04	[-0.369 0.288]	1038	0.902	-0.017	[-0.283 0.249]	0.598	-0.102	[-0.481 0.278]	0.635	0.124	[-0.388 0.636]
	Fat cell sizes and adipokines	visceral fat cell size (µm)	247	0.635	1.466	[-4.672 7.605]	0.79	-1.376	[-11.625 8.873]	0.292	5.379	[-4.721 15.48]	68	0.439	2.434	[-3.816 8.685]	0.136	7.264	[-2.36 16.889]	0.745	-1.904	[-13.567 9.759]
		max. vis. Fat cell size (µm)	248	0.882	-0.625	[-8.971 7.72]	0.907	0.824	[-13.207 14.855]	0.733	-2.255	[-15.334 10.825]	84	0.495	2.813	[-5.364 10.991]	0.364	5.639	[-6.659 17.936]	0.882	1.128	[-14 16.256]
		subcutaneous fat cell size (µm)	249	0.939	-0.244	[-6.647 6.16]	0.748	-1.611	[-11.599 8.377]	0.825	1.205	[-9.673 12.083]	57	0.463	-2.44	[-9.056 4.176]	0.673	-2.051	[-11.74 7.637]	0.403	-5.22	[-17.64 7.2]
		max. sc. Fat cell size (µm)	249	0.61	-1.901	[-9.295 5.492]	0.741	2.027	[-10.137 14.192]	0.601	-7.211	[-19.32 4.898]	82	0.744	-1.216	[-8.597 6.166]	0.346	-5.204	[-16.136 5.728]	0.558	4.185	[-9.978 18.348]
		Leptin (ng/ml)	218	0.023	-3.825	[-7.111 -0.54]	0.026	-6.683	[-12.574 -0.793]	0.24	-3.935	[-8.879 1.01]	538	0.215	-2.071	[-5.346 1.204]	0.815	-0.56	[-5.247 4.127]	0.037	-6.744	[-13.073 -0.415]
		Adiponectin (µg/ml)	218	0.609	0.196	[-0.558 0.951]	0.668	-0.289	[-1.618 1.04]	0.275	0.604	[-0.483 1.691]	211	0.069	0.693	[-0.053 1.44]	0.022	1.202	[0.177 2.227]	0.751	0.237	[-1.234 1.707]
	Inflammatory parameters and hormone status	C-reactive protein (mg/l)	1333	0.958	-0.032	[-1.225 1.161]	0.846	-0.212	[-2.359 1.935]	0.935	0.075	[-1.71 1.859]	1089	0.625	0.323	[-0.973 1.62]	0.643	0.44	[-1.419 2.298]	0.75	0.405	[-2.089 2.9]
		IL-6 (pg/ml)	1	NA	NA	NA	NA	NA	NA	NA	NA	NA	1	NA	NA	NA	NA	NA	NA	NA	NA	NA
		TSH (mU/l)	160	0.646	0.147	[-0.578 0.872]	0.382	-0.493	[-1.744 0.757]	0.173	0.562	[-0.314 1.438]	9	0.528	-0.394	[-1.979 1.19]	0.539	0.552	[-1.734 2.838]	0.136	-1.023	[-2.55 0.504]
		free T3 (pmol/l)	1010	0.262	-0.074	[-0.202 0.055]	0.978	-0.003	[-0.233 0.227]	0.096	-0.164	[-0.356 0.029]	310	0.782	-0.019	[-0.156 0.117]	0.806	-0.023	[-0.21 0.164]	0.843	-0.028	[-0.305 0.249]
		free T4 (pmol/l)	319	0.284	-0.317	[-0.899 0.264]	0.035	-1.109	[-2.141 -0.077]	0.875	0.07	[-0.802 0.943]	318	0.364	0.286	[-0.334 0.906]	0.298	0.45	[-0.399 1.298]	0.766	0.189	[-1.063 1.442]
		Vitamin D (ng/ml)	328	0.508	-2.211	[-9.466 5.044]	0.267	-8.317	[-24.215 7.581]	0.822	-0.915	[-9.842 8.011]	12	0.141	-5.341	[-12.946 2.264]	0.383	-3.69	[-13.059 5.678]	0.03	-22.22	[-41.611 -2.828]
		Cortisol (nmol/l)	166	0.71	-4.955	[-31.201 21.29]	0.805	-5.723	[-51.409 39.964]	0.719	-7.499	[-48.543 33.545]	239	0.296	-14.818	[-42.663 13.028]	0.175	-29.171	[-71.372 13.03]	0.777	-7.458	[-59.328 44.412]
		Testosterone (nmol/l)	284	0.16	-0.489	[-1.175 0.196]	0.155	-0.891	[-2.126 0.344]	0.359	-0.478	[-1.508 0.552]	66	0.437	-0.405	[-1.439 0.629]	0.339	-0.649	[-1.994 0.697]	0.924	-0.105	[-2.299 2.088]
	Other	Creatinine (µmol/l)	101	0.246	2.003	[-1.385 5.391]	0.57	1.74	[-4.269 7.748]	0.203	3.342	[-1.802 8.487]	1023	0.161	2.699	[-1.075 6.473]	0.056	5.304	[-0.136 10.744]	0.881	0.55	[-6.672 7.771]
		Albumin (g/dl)	1340	0.624	-0.069	[-0.347 0.208]	0.284	-0.272	[-0.77 0.226]	0.871	0.035	[-0.388 0.458]	508	1	8.59e-05	[-0.331 0.331]	0.331	0.241	[-0.246 0.729]	0.212	-0.399	[-1.025 0.228]
		Erythrocyte (Tpt/l)	604	0.245	-0.029	[-0.079 0.02]	0.502	-0.031	[-0.12 0.059]	0.232	-0.046	[-0.12 0.029]	760	0.265	-0.034	[-0.094 0.026]	0.105	-0.073	[-0.161 0.015]	0.987	-0.001	[-0.115 0.113]
		Leukocytes (Gpt/l)	1336	0.043	0.207	[0.006 0.408]	0.029	0.402	[0.042 0.763]	0.228	0.185	[-0.116 0.486]	1089	0.178	0.156	[-0.071 0.382]	0.357	0.153	[-0.172 0.477]	0.175	0.302	[-0.135 0.738]
	* Adjusted for sex, age and BMI (except BMI phenotype); ADD- additiv; DOM- dominant; REC- recessive; beta- effect size; 95%[CI]- 95 % confidence interval; vis- visceral tissue; sc- subcutanous tissue; BMI- body max index; WHR- waist hip ratio; FPG- fasting plasma glucose; FPI- fasting plasma insulin; HbA1c- glycated haemoglobin; HOMA- homeostatic model assessment; oGTT 2h- 120 min plasma glucose;…

## Sheet: Table S4
Table 4
		HbA1c				FPG
	Predictors	ß	SE	P	95%[CI]	ß	SE	P	95%[CI]
	rs10195252a	1.5168	1.0393	>0.05	[-0.5299 3.5636]	0.2251	0.1655	>0.05	[-0.1004 0.5506]
	vis GRB14 mRNA expressionb	1.4098	0.5184	<0.01	[0.3959 2.4237]	0.2186	0.087	<0.05	[0.0475 0.3898]
	Indirect effect (rs10195252*GRB14)c	0.4277	0.2421	<0.05	[0.0223 0.9619]	0.039	0.0281	>0.05	[-0.0066 0.1029]
	N	258				376
		vis COBLL1 mRNA expression				vis GRB14 mRNA expression
	rs10195252a	-0.1496	0.539	<0.01	[-0.2555 -0.0437]	0.2269	0.0634	<0.001	[-2.1439 -0.6512]
	vis GRB14 mRNA expressionb	0.564	0.295	<0.0001	[0.506 0.622]	/
	vis COBLL1 mRNA expressionb	/				0.7892	0.0413	<0.0001	[0.7081 0.8703]
	Indirect effect (rs10195252*GRB14 or COBLL1)c	0.1106	0.055	<0.05	[0.0113 0.2293]	-0.0307	0.0601	>0.05	[-0.1437 0.0899]
	N	462
	FPG- fasting plasma glucose; HbA1c-glycated haemoglobin;vis-abdominal omental;aeffect of SNP on dependent variable (path c`); beffect of mediator (gene expression) on dependent variable (path b); c indirect effect of SNP on dependent variable (path ab); N-number; ß-represents unstandardized regression coefficient; SE- standard error; CI- confidence interval; P value adjusted for age, sex and BMI.

## Sheet: Table S5
Table 5
	Correlation
			vis_COBLL1	sc_COBLL1	vis_GRB14	sc_GRB14
	vis_COBLL1	Pearson Correlation	1	0.133**	0.656**	0.151**
		significance (2-tailed)		0.002	1.3e-70	0.0003
		N	608	523	563	560
	sc_COBLL1	Pearson Correlation	0.133**	1	0.009	0.562**
		significance (2-tailed)	0.002		0.836	9.8e-42
		N	523	527	483	486
	vis_GRB14	Pearson Correlation	0.656**	0.009	1	0.159**
		significance (2-tailed)	1.3e-70	0.836		0.0002
		N	563	483	563	519
	sc_GRB14	Pearson Correlation	0.151**	0.562**	0.159**	1
		significance (2-tailed)	0.0003	9.8e-42	0.0002
		N	560	486	519	564
	** Correlation is significant at the 0.01 level (2-tailed). Vis- abdominal omental tissue; Sc- subcutanous tissue
	Correlation
			ln_vis_COBLL1	ln_sc_COBLL1	ln_vis_GRB14	ln_sc_GRB14
	ln_vis_COBLL1	Pearson Correlation	1	0.053	0.789**	0.114**
		significance (2-tailed)		0.222	7.7e-121	0.007
		N	608	523	563	560
	ln_sc_COBLL1	Pearson Correlation	0.053	1	0.063	0.738**
		significance (2-tailed)	0.222		0.164	8.6e-85
		N	523	527	483	486
	ln_vis_GRB14	Pearson Correlation	0.789**	0.063	1	0.146**
		significance (2-tailed)	7.7e-121	0.164		0.001
		N	563	483	563	519
	ln_sc_GRB14	Pearson Correlation	0.114**	0.738**	0.146**	1
		significance (2-tailed)	0.007	8.6e-95	0.001
		N	560	486	519	564
	The correlation of natural log transformed vis COBLL1/GRB14 mRNA levels (n=563) and sc COBLL1/GRB14 mRNA (n=486) are shown. ** Correlation is significant at the 0.01 level (2-tailed). Vis- abdominal omental tissue; Sc- subcutanous tissue
